# Supplementary material for: A new method to characterize function of theDrosophilaheart by means of optical flow
Source: Oxford University Press journal article supplement (doi:10.1242/jeb.164343), 2017-12-13
Supplement: jeb164343supp.pdf [file jeb164343supp.pdf]

## Supplementary Movies

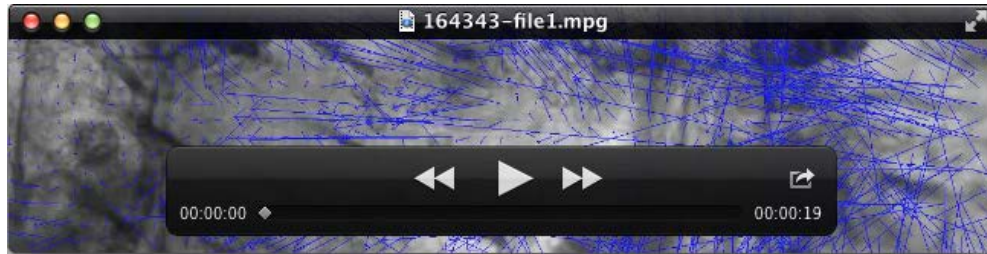

**Movie 1:** Slow motion video of a beating *Drosophila* heart illustrating coherent movement vectors. Genotype: wild type Canton-S. The original video was captured at 207 fps.

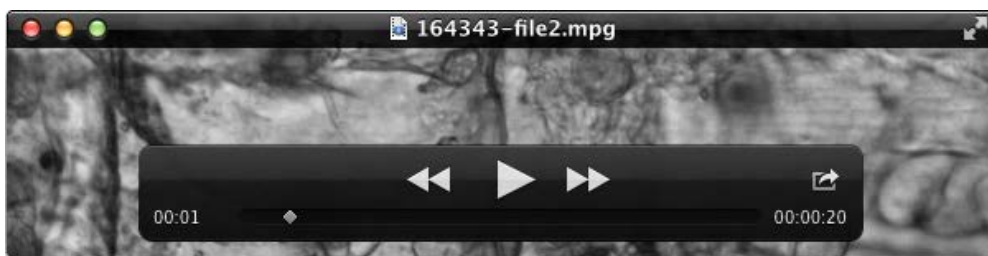

**Movie 2:** Slow motion video of a beating *Drosophila* heart illustrating “shallow” contractions of a RyR-knocked down heart. Genotype: hand>UAS-RyR-KD. The original video was captured at 207 fps.

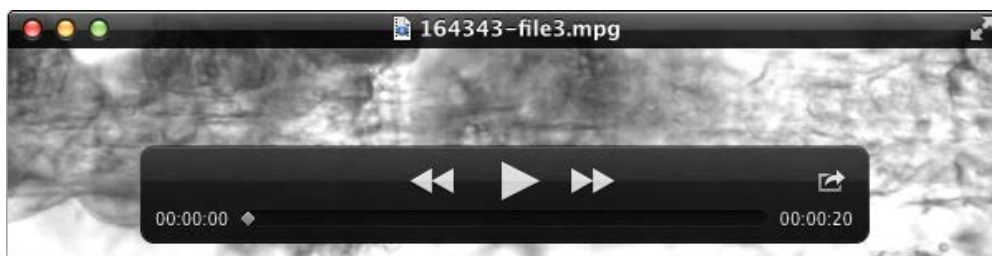

**Movie 3:** Slow motion video of a beating *Drosophila* heart illustrating “inclined” contractions of a hypertrophied heart. Genotype: hand>UAS-Ras85D<sup>V12</sup>. The original video was captured at 207 fps.
